# Supplementary material for: Protection and Restoration of Damaged Hair via a Polyphenol Complex by Promoting Mechanical Strength, Antistatic, and Ultraviolet Protection Properties
Source: MDPI journal article supplement (doi:10.3390/biomimetics8030296), 2023-07-09
Supplement: s1 [file s1]

## **1. Experimental Section**

### ***1.1. In vitro investigation of ROS scavenging capabilities***

For optical imaging, HeLa cells with a concentration of  $10^5$  cells/well were cultured on a 24-well plate and placed in a humidified incubator (5 % CO<sub>2</sub> atmosphere) for 12 h at 37°C. Then, the solution media was changed with media containing TA/GA/CA at a concentration of 1.6 mg/mL and incubated at designated times (0, 3, 6, and 12 h). The cells were detached using trypsin-EDTA, centrifuged, and washed with PBS pH 7.4 before being stained with 2',7'-dichlorodihydrofluorescein diacetate (H2DCFDA) and imaged with a confocal microscope (magnification, 40×).

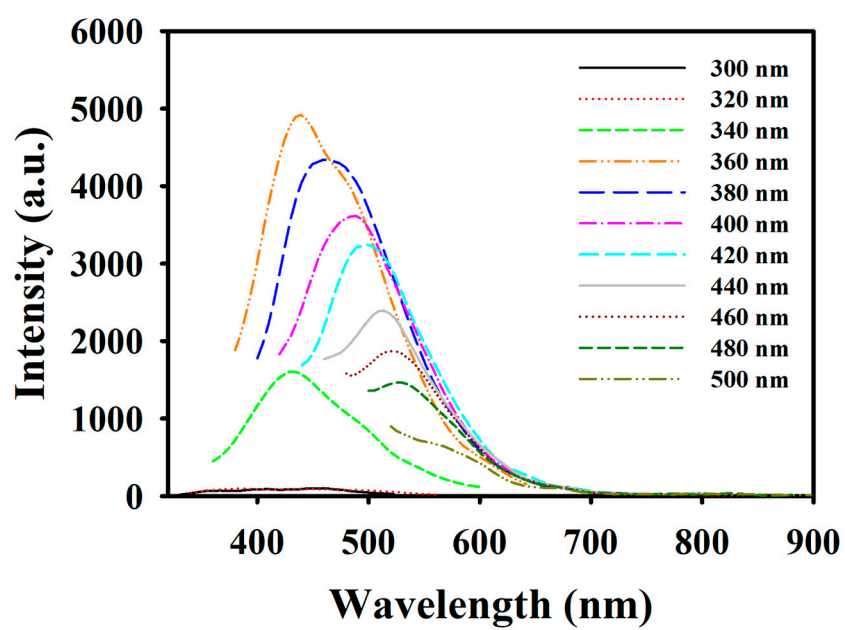

**Figure S1.** The photoluminescence (PL) spectra of PPC1.

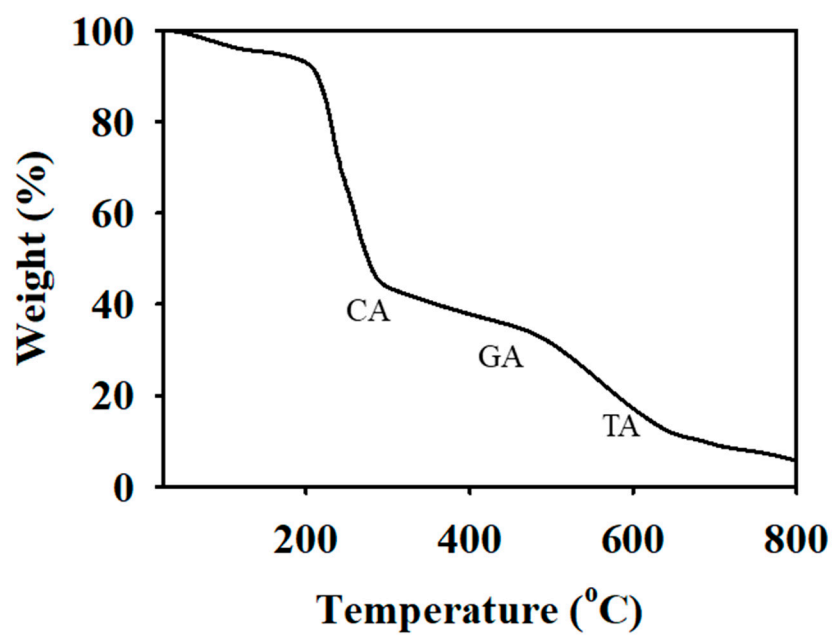

**Figure S2.** The thermogravimetric analysis (TGA) profile of PPC1.

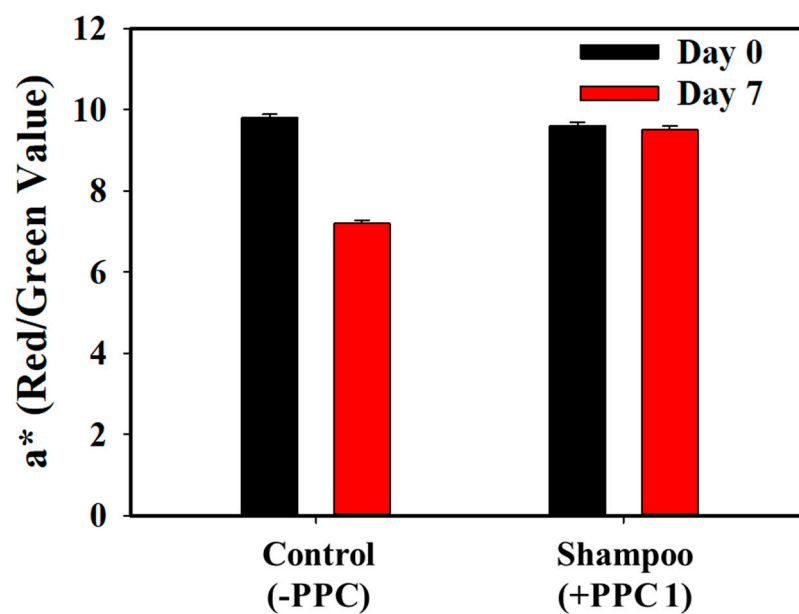

**Figure S3.** The change of color (a\*, red and green) on dye-coated hair model treated with control (shampoo without PPC) and shampoo + PPC1 after 7 days exposed by UV light.

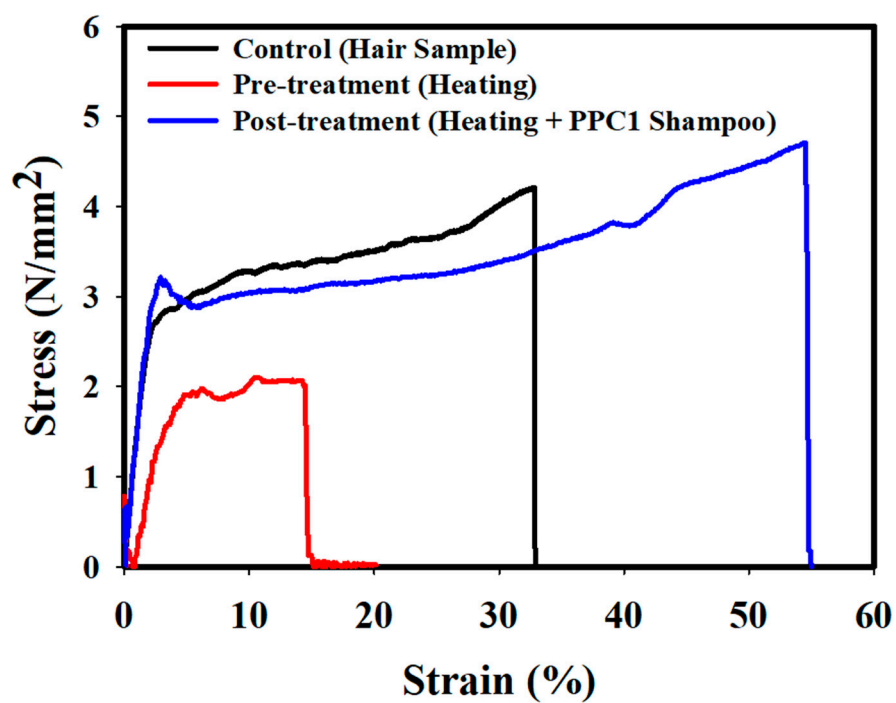

**Figure S4.** Tensile strength measurement of heat-damaged hair sample pre- and post- treatment with PPC1-supplemented shampoo.

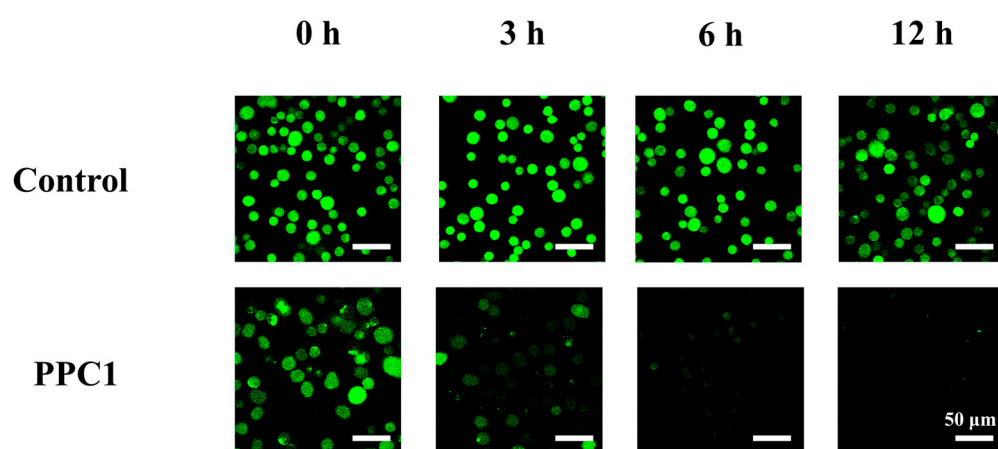

**Figure S5.** Confocal images of ROS staining assay using H2DCFDA stain on HeLa cells in the absence (control) and presence of PPC1.
